# Supplementary figures and images for: Ab initio investigation of electronic structure and optical properties of IrSn4
Source: Royal Society of Chemistry journal article supplement (doi:10.1039/d2ra01672a), 2022-01-01

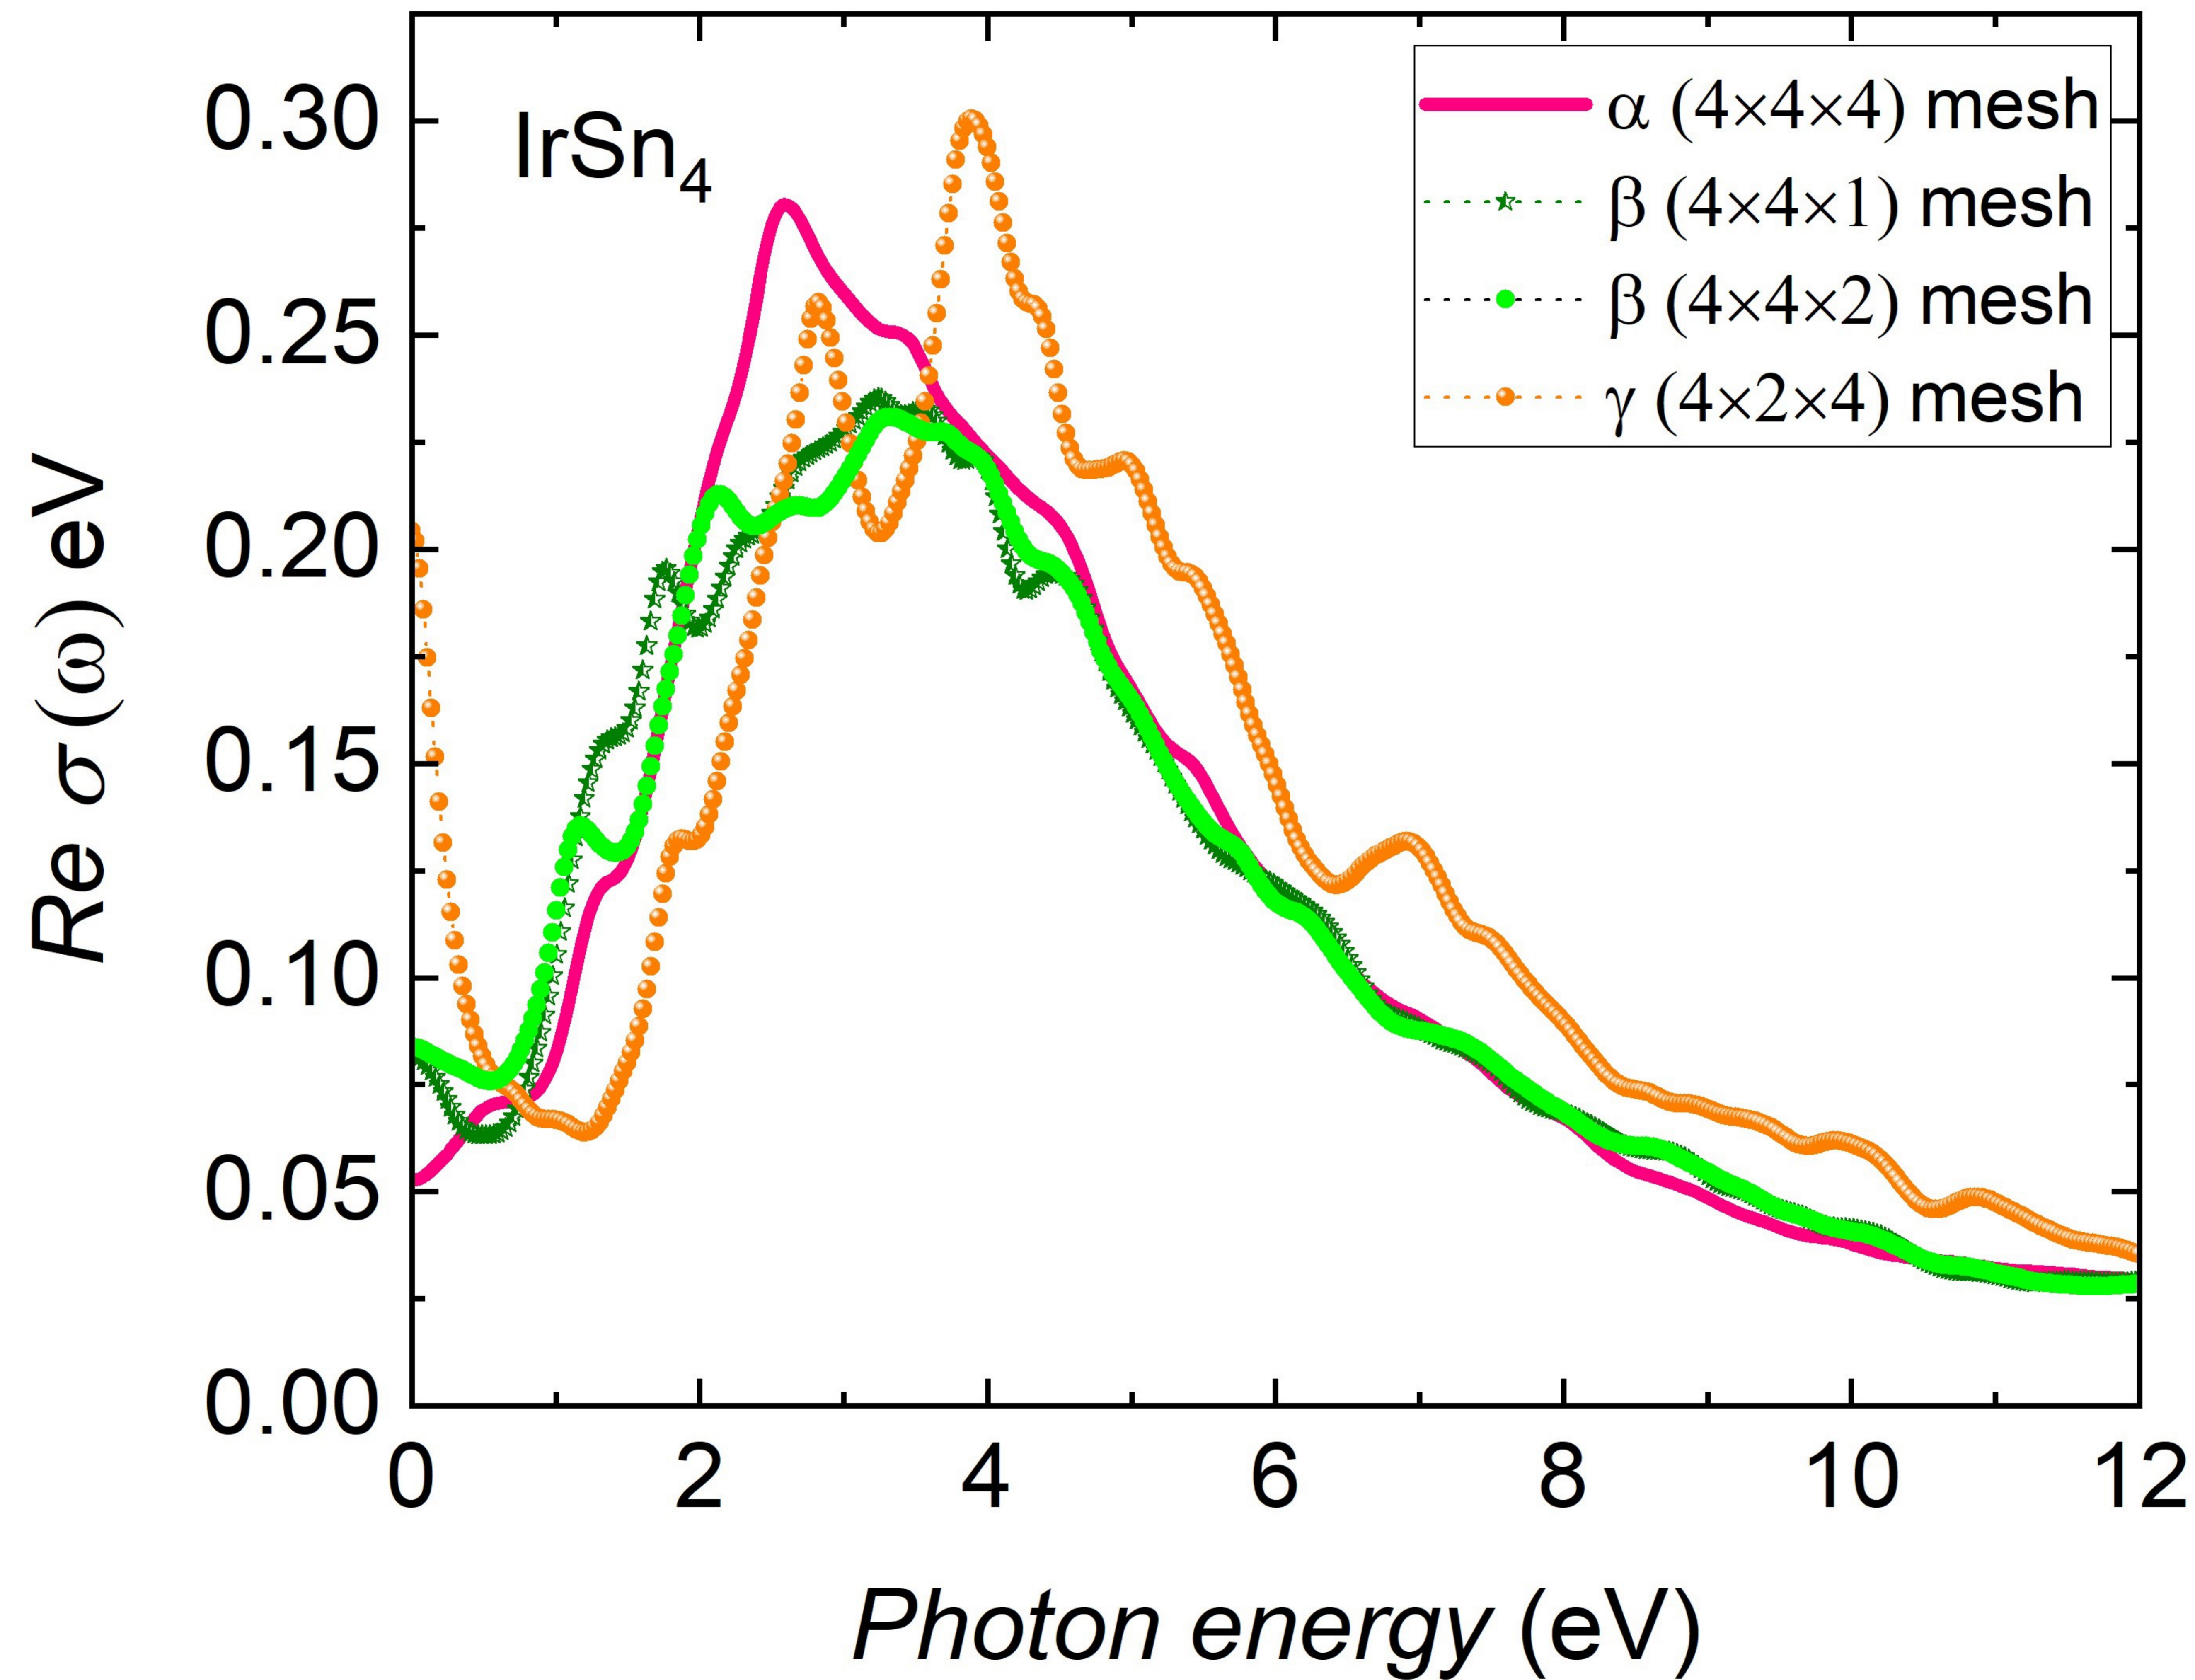

Supplement: d2ra01672a1.pdf [file d2ra01672a1.pdf]
